# Supplementary material for: Preparation, characterization and antibiotic properties of silver–silicon nanocomposites
Source: Royal Society of Chemistry journal article supplement (doi:10.1039/c6nj02916g), 2016-12-28
Supplement: c6nj02916g1.pdf [file c6nj02916g1.pdf]

## Electronic Supplementary Information

### Preparation, characterization and antibiotic properties of silver-silicon nanocomposites

Huan Chang,<sup>a</sup> Wei Gao,<sup>b</sup> Xiangyu Sun,<sup>a</sup> Hui Tan,<sup>c\*</sup> Shuqing Sun,<sup>a\*</sup>

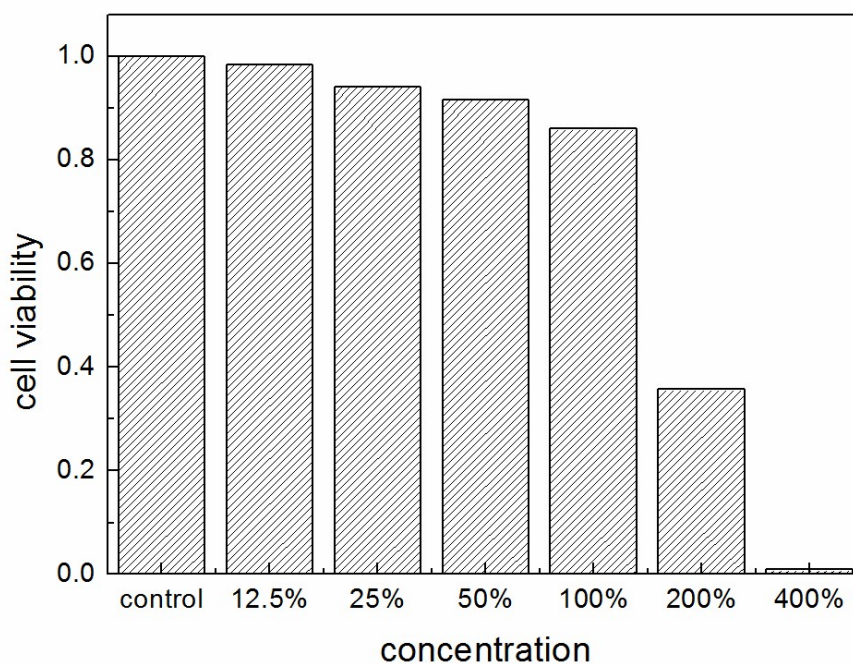

Figure S1 Cell viability of magnetic Ag@PSMs-75 for 24 h.

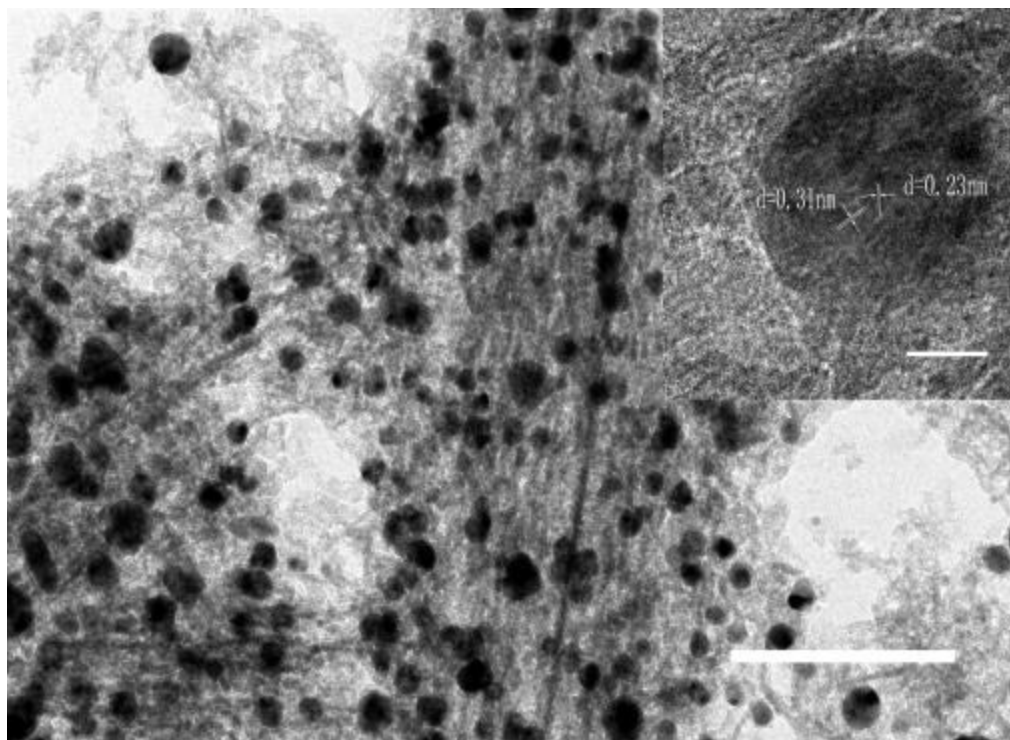

Figure S2 Transmission electron micrograph of Ag@PSMs-75; the inset is a HRTEM image of single Ag NPs anchored on the PSMs of sample Ag@PSMs-75.
